# Supplementary material
Source: PubMed Central journal article supplement (PMC4069223)
Supplement: NIHMS578823-supplement-01.pdf [file NIHMS578823-supplement-01.pdf]

**Table S1: Characteristics by quartiles of ACR (mg/g)**

|                | ACR                 |                     |                     |                     |
|----------------|---------------------|---------------------|---------------------|---------------------|
|                | Q1                  | Q2                  | Q3                  | Q4                  |
| Range          | <4.57               | 4.57 – 8.28         | 8.29 – 20.33        | ≥20.34              |
| N              | 743                 | 738                 | 735                 | 701                 |
| Age            | 73 (±3)             | 73 (±3)             | 74 (±3)             | 74 (±3)             |
| Male           | 389 (±52)           | 330 (±45)           | 317 (43)            | 371 (±53)           |
| Blacks         | 294 (±40)           | 274 (±37)           | 284 (±39)           | 350 (±50)           |
| Site           |                     |                     |                     |                     |
| Memphis        | 383 (±52)           | 378 (±51)           | 351 (±48)           | 358 (±51)           |
| Pittsburgh     | 360 (±49)           | 360 (±49)           | 384 (±52)           | 343 (±49)           |
| Education      |                     |                     |                     |                     |
| < HS           | 180 (±24)           | 188 (±26)           | 168 (±23)           | 203 (±29)           |
| HS Grad        | 227 (±31)           | 255 (±35)           | 254 (±35)           | 209 (±30)           |
| Postsecondary  | 333 (±45)           | 294 (±40)           | 312 (±43)           | 286 (±41)           |
| Diabetes       | 125 (±17)           | 128 (±18)           | 151 (±21)           | 258 (±38)           |
| Hypertension   | 405 (±55)           | 452 (±61)           | 505 (±69)           | 552 (±79)           |
| SBP            | 131 (±18)           | 134 (±19)           | 137 (±21)           | 142 (±23)           |
| DBP            | 70 (±11)            | 71 (±11)            | 72 (±12)            | 74 (±12)            |
| Smoking        |                     |                     |                     |                     |
| Never          | 317 (±43)           | 336 (±46)           | 332 (±45)           | 296 (±42)           |
| Former         | 352 (±48)           | 342 (±48)           | 323 (±44)           | 310 (±44)           |
| Current        | 72 (±10)            | 60 (±8)             | 78 (±11)            | 94 (±13)            |
| Alcohol        |                     |                     |                     |                     |
| Never          | 204 (±28)           | 222 (±30)           | 201 (±27)           | 186 (±27)           |
| Former         | 379 (±51)           | 358 (±49)           | 386 (±53)           | 330 (±47)           |
| Current        | 158 (±21)           | 152 (±21)           | 146 (±20)           | 182 (±26)           |
| Prevalent CHD  | 131 (±18)           | 134 (±19)           | 141 (±19)           | 177 (±26)           |
| Prevalent CBVD | 57 (±8)             | 46 (±6)             | 46 (±6)             | 74 (±11)            |
| Prevalent PAD  | 57 (±8)             | 46 (±6)             | 46 (±6)             | 74 (±11)            |
| COPD           | 104 (±17)           | 101 (±17)           | 116 (±20)           | 162 (±29)           |
| BMI            | 27.5 (±4.6)         | 27.1 (±4.7)         | 27.2 (5.0)          | 27.6 (4.8)          |
| CRP*           | 1.59<br>[0.94,2.82] | 1.67<br>[1.00,3.01] | 1.64<br>[1.00,3.04] | 1.80<br>[1.02,3.68] |
| Albumin        | 3.93 (±0.31)        | 3.98 (±0.30)        | 4.01 (±0.31)        | 3.99 (±0.32)        |
| Cholesterol    | 200 (±35)           | 207 (±38)           | 206 (±40)           | 199 (±40)           |
| LDL            | 121 (±33)           | 125 (±34)           | 123 (±35)           | 118 (±36)           |
| HDL            | 54 (±16)            | 55 (±17)            | 56 (±18)            | 53 (±17)            |
| Triglycerides* | 113<br>[87,156]     | 120<br>[88,160]     | 117<br>[88,161]     | 123<br>[88,175]     |
| eGFR-cysC      | 81 (±19)            | 81 (±19)            | 81 (±20)            | 74 (±25)            |

\*median[IQR]

Continuous variables are mean ± standard deviation (SD)
